# Supplementary material for: Small Angle X-ray Scattering Sensing Membrane Composition: The Role of Sphingolipids in Membrane-Amyloid β-Peptide Interaction
Source: MDPI journal article supplement (doi:10.3390/biology11010026), 2021-12-25
Supplement: s1 [file s1]

# **Small angle X-ray scattering sensing membrane composition: the role of sphingolipids on membrane-amyloid $\beta$ -peptide interaction**

**Rita Carrotta<sup>1\*</sup>, Maria Rosalia Mangione<sup>1</sup>, Fabio Librizzi<sup>1</sup> and Oscar Moran<sup>2</sup>**

<sup>1</sup> CNR, Istituto di Biofisica - Via Ugo La Malfa 153 - 90146 Palermo, Italy

<sup>2</sup> CNR, Istituto di Biofisica - Via De Marini, 6 - 16149 Genova, Italy

\*Corresponding author

## SUPPLEMENTARY MATERIAL

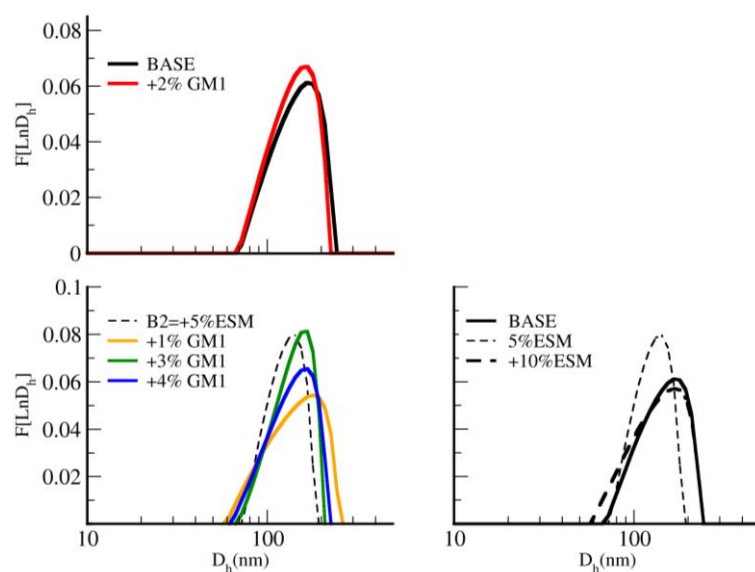

**Figure S1.** Dynamic light scattering size distributions for the various LUV samples used. The size distributions as a function of the hydrodynamic diameter which is related to  $\Gamma$ , that is to the decay of the intensity autocorrelation function, corresponding to a single species. The two variables are related according to the expression  $D_h = KT q^2 / (3\pi\eta\Gamma)$ , where  $K$  is the Boltzmann constant,  $T$  the temperature,  $q$  the wave vector corresponding to the scattering angle  $\theta$  ( $90^\circ$  in our case), with  $q = (4\pi/\lambda) \sin\theta/2$ . Details on the method to obtain the size distribution from dynamic light scattering data can be found elsewhere [21].

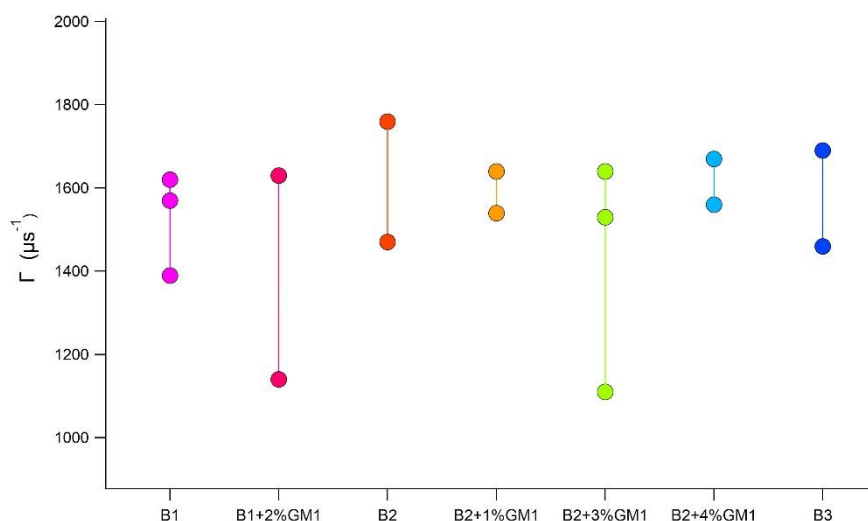

**Figure S2.** Decay constant  $\Gamma$ , calculated from the distribution obtained by the CONTIN-like analysis (of the intensity autocorrelation function). Data in the graphic are the individual measurements for each bilayer matrix (two to three replicates per each experimental condition).

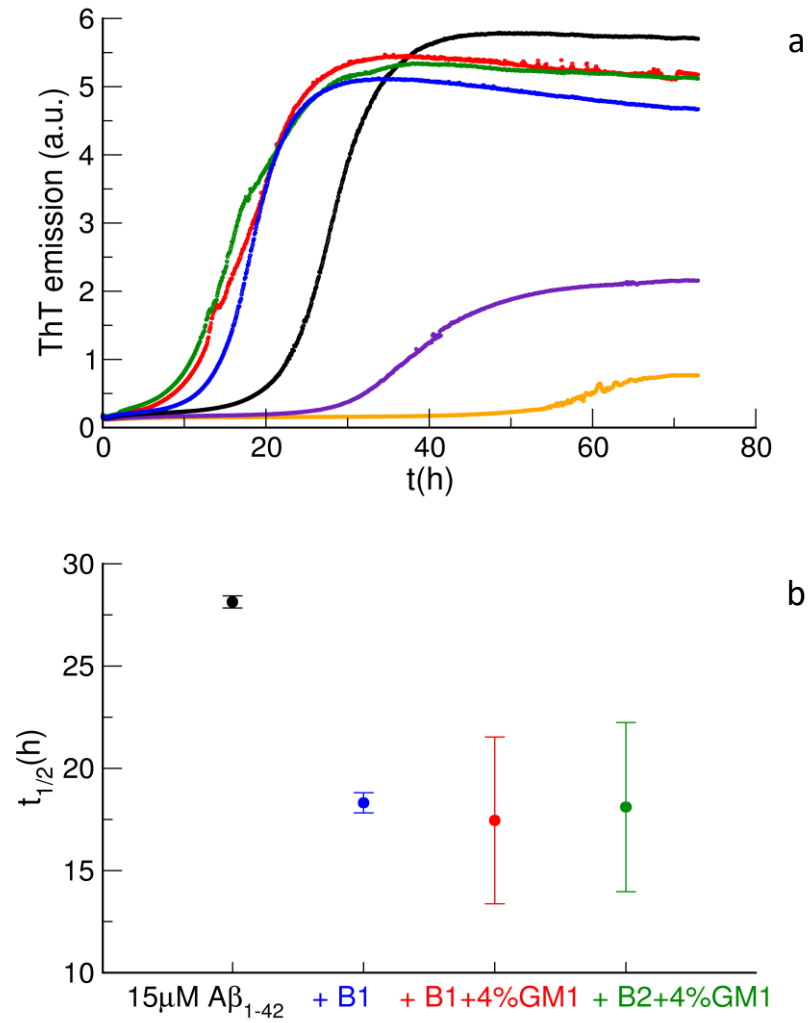

**Figure S3:** Kinetics of Aβ<sub>1-42</sub> alone at different concentration: 4.75 μM (orange), 7.5 μM (violet) and 15 μM (black) and at 15 μM in the presence of different LUVs, matrix B1 (blue), B1+ 4%GM1 (red) and B2+ 4%GM1 (a). Half growth time of the ThT aggregation kinetics for the different samples. Error bar is calculated as standard deviation from three replicates (b). The ratio lipid:Aβ<sub>1-42</sub> was 250:1.
